# Supplementary material for: Personalizing deep brain stimulation using advanced imaging sequences
Source: bioRxiv or medRxiv preprint supplement (doi:10.1101/2021.10.04.21264488), 2021-10-07
Supplement: Supplementary file [file media-1.pdf]

SUPPLEMENTARY MATERIAL

# SIEMENS MAGNETOM Skyra

## Routine

|                    |                   |
|--------------------|-------------------|
| Slab group 1       |                   |
| Slabs              | 1                 |
| Dist. factor       | 50 [%]            |
| Position           | Isocenter         |
| Orientation        | P6.8 P6.1 H7.2 mm |
| Phase enc. dir.    | R >> L            |
| Rotation           | 90 [deg]          |
| Phase oversampling | 0 [%]             |
| Slice oversampling | 0 [%]             |
| Slices per slab    | 160               |
| FoV read           | 240 [mm]          |
| FoV phase          | 81.3 [%]          |
| Slice thickness    | 1 [mm]            |
| TR                 | 3000 [ms]         |
| TE                 | 3.44 [ms]         |
| Averages           | 1                 |
| Concatenations     | 1                 |
| Filter             | Image filter, ... |
| Coil elements      | HE1-4             |

## Contrast

|                   |             |
|-------------------|-------------|
| Magn. preparation | Non-sel. IR |
| TI                | 414 [ms]    |
| Flip angle        | 8 [deg]     |
| Reconstruction    | Magnitude   |
| Fat suppr.        | None        |
| Water suppr.      | None        |
| Measurements      | 1           |

## Resolution

|                       |         |
|-----------------------|---------|
| Base resolution       | 256     |
| Phase resolution      | 100 [%] |
| Slice resolution      | 100 [%] |
| Phase partial Fourier | 7/8     |
| Slice partial Fourier | 6/8     |
| Filter 1              |         |
| Raw filter            | Off     |
| Filter 2              |         |
| Large FoV             | On      |
| Filter 3              |         |
| Normalize             | Off     |
| Filter 4              |         |
| Elliptical filter     | Off     |
| Interpolation         | Off     |
| -----                 |         |
| PAT mode              | None    |

## Geometry

|                  |             |
|------------------|-------------|
| Multi-slice mode | Single shot |
| Series           | Interleaved |
| -----            |             |

## System

|                          |           |
|--------------------------|-----------|
| Save uncombined          | 0         |
| Scan at current TP       | 0         |
| Scan region position     | H         |
| Scan region position     | 0 [mm]    |
| MSMA                     | S - C - T |
| Sagittal                 | R >> L    |
| Coronal                  | A >> P    |
| Transversal              | F >> H    |
| Head 3T / HE             | 1         |
| -----                    |           |
| Shim mode                | Standard  |
| Confirm freq. adjustment | 0         |
| Assume Silicone          | 0         |

|                     |             |
|---------------------|-------------|
| Ref. amplitude [1H] | 126.364 [V] |
| Adjust volume       |             |
| Position            | Isocenter   |
| Orientation         | Transversal |
| Rotation            | 0.0[deg]    |
| A >> P              | 263 [mm]    |
| R >> L              | 350 [mm]    |
| F >> H              | 350 [mm]    |

## Physio

|                 |      |
|-----------------|------|
| 1st Signal/Mode | None |
| -----           |      |
| Dark blood      | 0    |
| -----           |      |
| Resp. control   | Off  |

## Inline

|                      |   |
|----------------------|---|
| Subtract             | 0 |
| Std-Dev-Sag          | 0 |
| Std-Dev-Cor          | 0 |
| Std-Dev-Tra          | 0 |
| Std-Dev-Time         | 0 |
| MIP-Sag              | 0 |
| MIP-Cor              | 0 |
| MIP-Tra              | 0 |
| MIP-Time             | 0 |
| Save original images | 1 |

## Sequence

|                     |             |
|---------------------|-------------|
| Introduction        | 1           |
| Dimension           | 3D          |
| Elliptical scanning | 0           |
| Averaging mode      | Long term   |
| Asymmetric echo     | Allowed     |
| Bandwidth           | 130 [Hz/Px] |
| Echo spacing        | 9.7 [ms]    |
| -----               |             |
| RF pulse type       | Fast        |
| Gradient mode       | Fast        |
| Excitation          | Slab-sel.   |
| RF spoiling         | 1           |
